# Supplementary material for: Selection on the regulation of sympathetic nervous activity in humans and chimpanzees
Source: PLOS journal article supplement (doi:10.1371/journal.pgen.1007311), 2018-04-19
Supplement: S14 (10.1371/journal.pgen.1007311.s014) [file journal.pgen.1007311.s014]

**Supplementary Table 3.** List of 10 unrelated chimpanzee samples whose genome data was used in this work. These samples were sequenced at the average sequencing coverage of 9.1.

| NCBI SRA Accession | Sample Name | Colony source of sample            |
|--------------------|-------------|------------------------------------|
| ERR225036          | PtYO        | Biomedical Primate Research Center |
| ERR225035          | PtSU        | Biomedical Primate Research Center |
| ERR225034          | PtRN        | Biomedical Primate Research Center |
| ERR225033          | PtRN        | Biomedical Primate Research Center |
| ERR225032          | PtRG        | Biomedical Primate Research Center |
| ERR225031          | PtPE        | Biomedical Primate Research Center |
| ERR225030          | PtLI        | Biomedical Primate Research Center |
| ERR225029          | PtLA        | Biomedical Primate Research Center |
| ERR225028          | PtFR        | Biomedical Primate Research Center |
| ERR225027          | PtAC        | Biomedical Primate Research Center |
